# Supplementary material for: Arabidopsis ASYMMETRIC LEAVES2 and Nucleolar Factors Are Coordinately Involved in the Perinucleolar Patterning of AS2 Bodies and Leaf Development
Source: MDPI journal article supplement (doi:10.3390/plants12203621), 2023-10-19
Supplement: s1 [file s1]

Figure S1

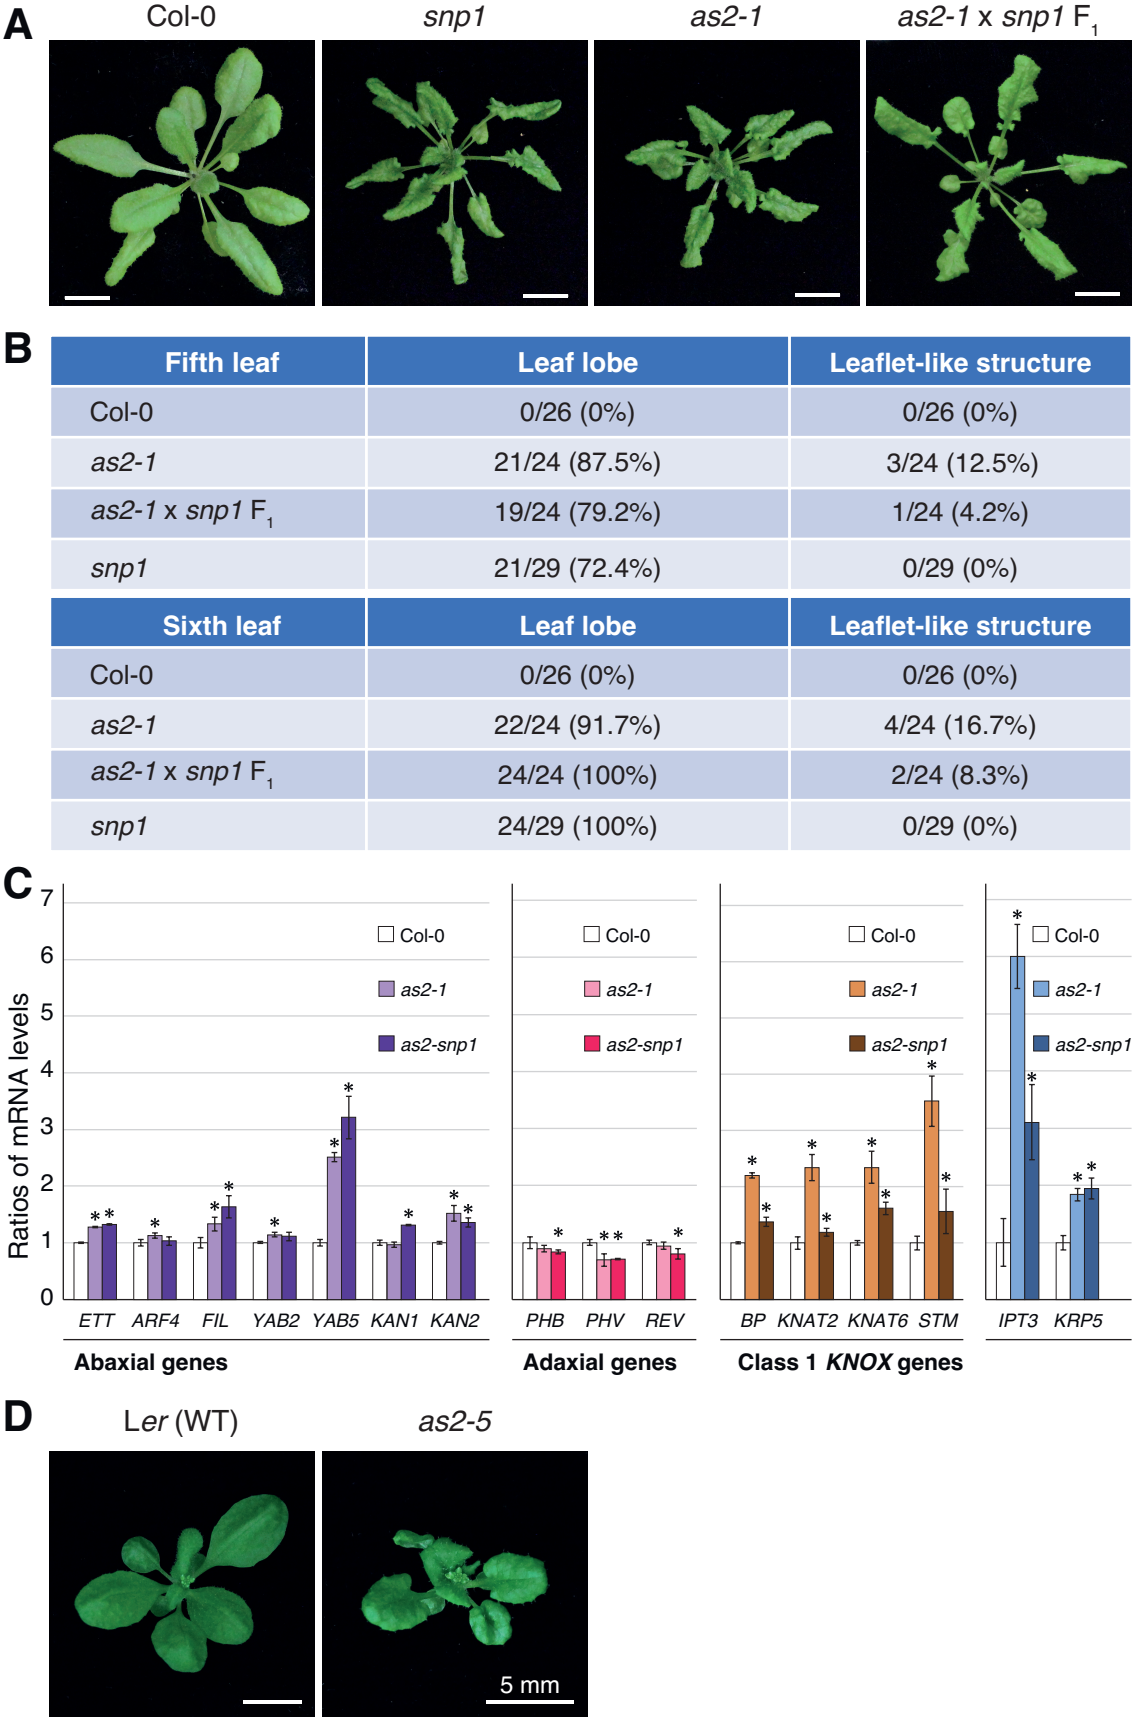

**Figure S1. *as2* mutants with base substitutions resulting in amino acid replacements in AS2/LOB domain.** (A) Leaf phenotype of *snp1* plants at 35 DAS. Bars, 5 mm. (B) The shapes of the fifth and sixth leaves of *snp1* plants at 35 DAS. (C) Levels of transcripts in the shoot apices of Col-0, *as2-1*, and *as2-snp1* mutants. Plants were grown at 22°C. Total RNA was prepared from shoot apices of 14-day-old plants, and transcript levels were examined by quantitative real-time RT-PCR. Each value was normalized by reference to the level of ACTIN (*ACT2*, At3g18780) transcripts. The values from Col-0 plants were set arbitrarily at 1.0. Bars indicate the s.d. from more than three biological replicates. White-purple-colored graphs: abaxial genes; white-pink-colored graphs: adaxial genes; white-brown-colored graphs: class 1 *KNOX* genes, white-blue-colored graphs: *IPT3* and *KRP5*. Significant differences from wild type were evaluated by Student's t-test and are represented by asterisks (\*P<0.01). (D) Leaf phenotype of *as2-5* plants at 25 DAS.

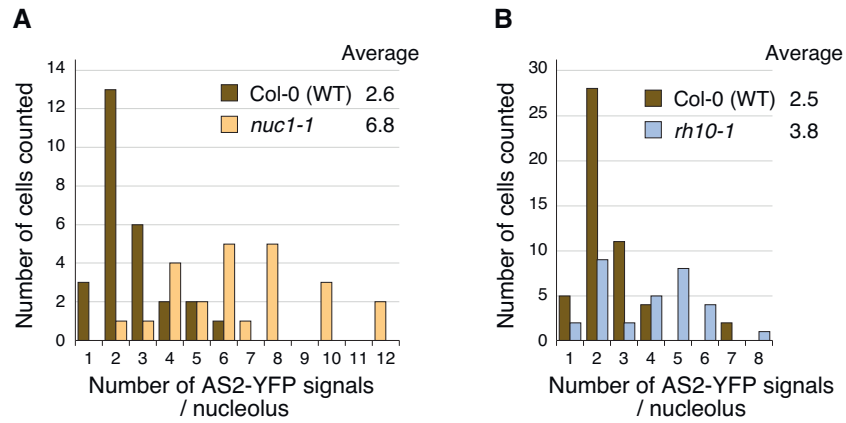

**Figure S2. Distribution patterns of the number of AS2-YFP signals in nucleolus of the *nuc1-1* and *rh10-1* mutants.** Expression of AS2-YFP was induced by incubating 6-day-old transgenic Arabidopsis plants (6 days after sowing) with 0.05  $\mu$ M of 17 $\beta$ -estradiol for 16 h at 22°C. **(A)** Signals due to YFP in nucleolus were counted in Col-0 (27 cells) and *nuc1-1* (24 cells). **(B)** Signals due to YFP in nucleolus were counted in Col-0 (50 cells) and *rh10-1* (31 cells).

#### **XhoI-AS2(CmASL3(Q21T\_P22S\_E23D))-3xGly-NcoI**

GGGGCTCGAGATGCGCATCTTCTTCAACAAACTCACCATGCGCCGCTTGC AAATTCCTCCG  
GCGAAAAATGTACGTACAGACTGTGTATTTCGCGCCCTATTTCCCACCGGACCAGCCACAAA  
AATTCGCAAACGTTTCAAAAGTGTTTGGAGCAAGTAACGTGACAAAGCTCCTCAACGAG  
CTTCACCCTTCACAACGTGAAGACGCAGTGAACCTTTTGGCCTATGAAGCCGACATGCG  
CCTCCGTGACCCTGTCTACGGCTGCGTCGGCGTCATCTCTCTCCTCCAACATCAGCTTCGT  
CAGCTTCAGATAGATCTCAGCTGTGCTAAATCTGAGCTCTCTAAGTACCAAAGCCTCGGT  
ATCCTCGCCGCCACTCATCAGAGTCTTGGCATCAACTTACTCGCCGGAGCAGCAGATGGA  
ACAGCCACCGCCGTGAGAGACCACTATCACCACCACCAGTTTTTTCCTAGAGAACAAAT  
GTTTGGTGGCTTGGATGTTCCGGCCGGTAACAACTACGACGGTGGGATTCTTGCCATTGG  
ACAGATCACTCAGTTTCAGCAGCCGAGAGCCGCCGCTGGAGATGATGGTCGCCGTACTG  
TTGATCCGTCTGGAGGTGGCGCCATGGGAA

#### **XhoI-AS2(E23D)-3xGly-NcoI**

GGGGCTCGAGATGCGCATCTTCTTCAACAAACTCACCATGCGCCGCTTGC AAATTCCTCCG  
GCGAAAAATGTCAACCGGACTGTGTATTTCGCGCCCTATTTCCCACCGGACCAGCCACAAA  
AATTCGCAAACGTTTCAAAAGTGTTTGGAGCAAGTAACGTGACAAAGCTCCTCAACGAG  
CTTCACCCTTCACAACGTGAAGACGCAGTGAACCTTTTGGCCTATGAAGCCGACATGCG  
CCTCCGTGACCCTGTCTACGGCTGCGTCGGCGTCATCTCTCTCCTCCAACATCAGCTTCGT  
CAGCTTCAGATAGATCTCAGCTGTGCTAAATCTGAGCTCTCTAAGTACCAAAGCCTCGGT  
ATCCTCGCCGCCACTCATCAGAGTCTTGGCATCAACTTACTCGCCGGAGCAGCAGATGGA  
ACAGCCACCGCCGTGAGAGACCACTATCACCACCACCAGTTTTTTCCTAGAGAACAAAT  
GTTTGGTGGCTTGGATGTTCCGGCCGGTAACAACTACGACGGTGGGATTCTTGCCATTGG  
ACAGATCACTCAGTTTCAGCAGCCGAGAGCCGCCGCTGGAGATGATGGTCGCCGTACTG  
TTGATCCGTCTGGAGGTGGCGCCATGGGAA

**Figure S3. The DNA sequences synthesized.** as2(Q21T\_P22S\_E23D) and as2(E23D) DNA were synthesized and cloned in the EcoRV site of pUC by GenScript (Tokyo, Japan). The DNA sequences synthesized were described below. *Xho* I site was added upstream of the *AS2* start codon, and the codons that code for three Glycine and one Alanine as a linker and *Nco* I site were added downstream of *AS2*. The ATG colored with red indicates the start codon of *AS2*. The DNA sequences colored with yellow encode the three amino acid residues, which were replaced in as2(Q21T\_P22S\_E23D) and as2(E23D) variants, and the sequences colored with blue-green encode the four cysteine residues in the ZF-motif. The *Xho* I site is colored with cyan and the *Nco* I site is colored with purple.

**Table S1 Sequences of oligomers used for real-time RT-PCR, construction, genotyping, AlphaScreen and pull-down assays**

| <b>1 The primers used for real-time PCR (Takahashi et al., 2013; Matsumura et al., 2016)</b> |                                                            |                                   |
|----------------------------------------------------------------------------------------------|------------------------------------------------------------|-----------------------------------|
| name                                                                                         | sequence                                                   |                                   |
| ACTIN2-F                                                                                     | 5'- TCGGTGGTTCATTCTTGCT -3'                                |                                   |
| ACTIN2-R                                                                                     | 5'- GCTTTTAAAGCCTTTGATCTTGAGAG -3'                         |                                   |
| ETT-F                                                                                        | 5'- ATCATTGAGATTCCAGAGGGTCTT -3'                           |                                   |
| ETT-R                                                                                        | 5'- GGCTCCACCATCCGAACA -3'                                 |                                   |
| ARF4-F                                                                                       | 5'- CAGGTGTTATGGACCTGGATAGG -3'                            |                                   |
| ARF4-R                                                                                       | 5'- CCAGCAAATTGCGGGAAT -3'                                 |                                   |
| KAN1-F                                                                                       | 5'- CCACGCGCGTTTGT -3'                                     |                                   |
| KAN1-R                                                                                       | 5'- GACTTTGGSGTTGCTCTTCA -3'                               |                                   |
| KAN2-F                                                                                       | 5'- AAGGAACTAGATGGAAAGTGCTCAA -3'                          |                                   |
| KAN2-R                                                                                       | 5'- GCTTGTTCCCGAGATGCTTG -3'                               |                                   |
| FIL-F                                                                                        | 5'- GCCCACTTCCCCACATAC -3'                                 |                                   |
| FIL-R                                                                                        | 5'- TTGGTTTCTTCACGGGTGA -3'                                |                                   |
| YAB5-F                                                                                       | 5'- ACGCCCTAATTCCAGGCAAC -3'                               |                                   |
| YAB5-R                                                                                       | 5'- GTTGCTCAGTTATGGTACGAG -3'                              |                                   |
| PHB-F                                                                                        | 5'- GCTGTTGACTGGGTTCAGATGA -3'                             |                                   |
| PHB-R                                                                                        | 5'- GCGAAATAGCGACTATGCCAAT -3'                             |                                   |
| PHV-F                                                                                        | 5'- GTGAAACAGCTACGATACCAATAGAATC -3'                       |                                   |
| PHV-R                                                                                        | 5'- CCTTGCAAGGTACAGGAACT -3'                               |                                   |
| REV-F                                                                                        | 5'- ATCCAAAGTCGTTCACAAAAA -3'                              |                                   |
| REV-R                                                                                        | 5'- GACTCTGGGCTAATTGCCTGAT -3'                             |                                   |
| BP-F                                                                                         | 5'- TGTTGTTTCCACATATGAGCTCTCT -3'                          |                                   |
| BP-R                                                                                         | 5'- TCATGATCAGATCGGAAGCAAT -3'                             |                                   |
| KNAT2-F                                                                                      | 5'- TTCCGCTCGACGGAAGAC -3'                                 |                                   |
| KNAT2-R                                                                                      | 5'- AATCGGACGGCATCATCAAC -3'                               |                                   |
| KNAT6-F                                                                                      | 5'- GATGTCACCGGAGAGTCTCATG -3'                             |                                   |
| KNAT6-R                                                                                      | 5'- CGGCGGAGGAACATAGCA -3'                                 |                                   |
| STM-F                                                                                        | 5'- CTCCTCCCAAGGAACTAAGAAC -3'                             |                                   |
| STM-R                                                                                        | 5'- TCCTCTGCAACGATTTCG -3'                                 |                                   |
| IPT3-1F                                                                                      | 5'- CCGCCTGAAGCCGACTTAA -3'                                |                                   |
| IPT3-1R                                                                                      | 5'- TTTAGGACGGATTCAATGGAGAGA -3'                           |                                   |
| KRP2-F                                                                                       | 5'- CGTGGATTTACGATGATTTGAA -3'                             |                                   |
| KRP2-R                                                                                       | 5'- GCGGCGAGACTCTACATCTT -3'                               |                                   |
| KRP5-F                                                                                       | 5'- TCCTAGTGTCAATCAATGTCAAACG -3'                          |                                   |
| KRP5-R                                                                                       | 5'- CGTCGTATCCGGCTCTAATTTC -3'                             |                                   |
| <b>2 The primers used for as2-variant-YFP construction</b>                                   |                                                            |                                   |
| name                                                                                         | sequence                                                   |                                   |
| AS2(XhoI_1-)                                                                                 | 5'- GGGGCTCGAGATGGCATCTTCTTCAACAAACTC -3'                  |                                   |
| AS2(-597_GGG_NcoI)                                                                           | 5'- TTCCCATGCGCCACCTCCAGACGGATCAACAGTACGG -3'              |                                   |
| AS2(XhoI_22-)                                                                                | 5'- GGGGCTCGAGATGTCACCATGCGCCGCTTG -3'                     |                                   |
| AS2(XhoI_73-)                                                                                | 5'- GGGGCTCGAGATGGTATTTCGCGCCCTATTTC -3'                   |                                   |
| AS2(-327_GGG_NcoI)                                                                           | 5'- TTCCCATGCGCCACCTCCGAGCTCAGATTTAGCACAGC -3'             |                                   |
| T3                                                                                           | 5'- AATTAACCCTCACTAAAGGG -3'                               |                                   |
| T7                                                                                           | 5'- TAATACGACTCACTATAGGG -3'                               |                                   |
| pER8-ProF                                                                                    | 5'- GTAATATGCTCGACTCTAGG -3'                               |                                   |
| pER8-TerR                                                                                    | 5'- TGGTGTGTGGGCAATGAAAC -3'                               |                                   |
| <b>3 The primers used for genotyping</b>                                                     |                                                            |                                   |
| name                                                                                         | sequence                                                   |                                   |
| GFP F2                                                                                       | 5'- CAGCTCGCCGACCACTAC -3'                                 | for <i>EYFP</i>                   |
| GFP R2                                                                                       | 5'- CTTGTACAGCTCGTCCATGCC -3'                              |                                   |
| Nuc1-1GT_F1                                                                                  | 5'- CTCAGTTCTCCATGGGAAAGTC -3'                             | for <i>NUC1</i>                   |
| Nuc1-1GT_R1                                                                                  | 5'- AGAGACCTTACACGTTTCATGGG -3'                            |                                   |
| Nuc1-1GT_R2                                                                                  | 5'- TATCATCTTCAGGCTCTCTTTGCC -3'                           | for <i>nuc1-1</i>                 |
| RB06                                                                                         | 5'- TTCCCTTAATTCTCCGCTCATGATC -3'                          |                                   |
| YM-18                                                                                        | 5'- ATATCGAGCCCTCTACTAGCCA -3'                             | for <i>RH10</i> and <i>rh10-1</i> |
| YM-19                                                                                        | 5'- TCCTGTGAAGGTATGGAGACAC -3'                             |                                   |
| dCAPS-rid2-F                                                                                 | 5'- CCCTAAATTATGTGTGGC -3'                                 | for <i>RID2</i> and <i>rid2-1</i> |
| rid2-Rv                                                                                      | 5'- GCTCCGTCAATAACTCCAGAT -3'                              |                                   |
| <b>4 The DNA sequences of oligomers used for AlphaScreen &amp; pull-down assays</b>          |                                                            |                                   |
| name                                                                                         | sequence                                                   |                                   |
| biotin-Ex1_264                                                                               | 5'- CTCAGGGACATTTGGAACAAGCCCCGATTTCTCCGCCGCGATTTACGGG -3'  |                                   |
| nonlabel-Ex1_264                                                                             | 5'- CTCAGGGACATTTGGAACAAGCCCCGATTTCTCCGCCGCGATTTACGGG -3'  |                                   |
| antisense-Ex1_264                                                                            | 5'- CCCGTAAATCGCGGCGGAGAAATCGGGGCTTGTTCCTCAATGTCCCTGAG -3' |                                   |
| biotin-Ex1_264m                                                                              | 5'- CTCAGGGACATTTGGAACAAGCCCCGATTTCTCATAATAGATTTACGGG -3'  |                                   |
| nonlabel-Ex1_264m                                                                            | 5'- CTCAGGGACATTTGGAACAAGCCCCGATTTCTCATAATAGATTTACGGG -3'  |                                   |
| antisense-Ex1_264m                                                                           | 5'- CCCGTAAATCTATTATGAGAAATCGGGGCTTGTTCCTCAATGTCCCTGAG -3' |                                   |
